# Supplementary material
Source: publisher figshare collection journal article supplement (https://frontiersin.figshare.com/ndownloader/files/13663421)
Supplement: Supplementary file [file 13663421]

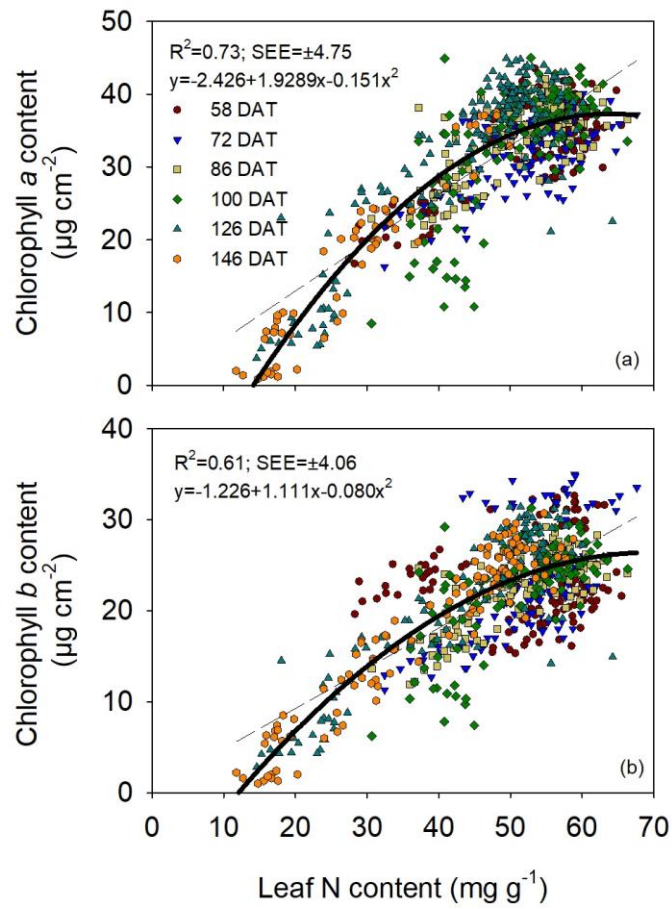

Figure S5. Relationship between leaf N content (mg g<sup>-1</sup>) and chlorophyll *a* and chlorophyll *b* contents (µg cm<sup>-2</sup>). Coefficient of determination ( $R^2$ ), standard error of the estimate ( $\pm$ SEE) and equation of the regression are shown (solid lines). Dotted lines represent the linear regression.
